# Supplementary material for: Experimental and theoretical study of the reactivity of a series of epoxides with chlorine atoms at 298 K
Source: Royal Society of Chemistry journal article supplement (doi:10.1039/d0cp06033j), 2021-01-01
Supplement: d0cp06033j2.xlsx [file d0cp06033j2.xlsx]

## Sheet: CyOx_Points
Hcis					~ H1					~ H2					~ H3
ε0	-309.999	ε0 + G_corr	-309.877		ε0	-309.327	ε0 + G_corr	-309.218		ε0	-309.337	ε0 + G_corr	-309.231		ε0	-309.333	ε0 + G_corr	-309.227
Atom	X	Y	Z		Atom	X	Y	Z		Atom	X	Y	Z		Atom	X	Y	Z
C	-0.985484	0.829809	-0.295617		C	0.746678	-1.01456	-0.31852		C	-0.985003	0.88312	-0.264038		C	-1.10619	0.661609	-0.260485
H	-1.73958	1.43447	-0.791264		C	1.22043	0.346845	-0.474452		H	-1.7889	1.50401	-0.640019		H	-2.00482	1.12321	-0.659981
C	-1.0869	-0.631041	-0.41515		H	2.10275	0.547773	-1.07187		C	-1.11516	-0.582402	-0.379669		C	-0.967838	-0.79299	-0.361971
H	-1.89943	-1.04349	-1.00816		C	0.265857	1.48699	-0.234251		H	-1.96881	-0.975732	-0.927799		H	-1.76467	-1.35274	-0.844439
C	0.133699	-1.50472	-0.284232		H	0.763815	2.28493	0.322742		C	0.133034	-1.43166	-0.4013		C	0.395074	-1.43262	-0.392522
H	-0.139762	-2.42873	0.231301		H	0.002825	1.90385	-1.21183		H	-0.097685	-2.42638	-0.012601		H	0.338246	-2.43517	0.038198
H	0.451186	-1.78953	-1.29263		C	-1.00627	1.02172	0.487921		H	0.437713	-1.56329	-1.44472		H	0.688775	-1.55076	-1.43963
C	1.28227	-0.798165	0.439458		H	-1.73391	1.83429	0.497081		C	1.26192	-0.794491	0.411988		C	1.44075	-0.594277	0.357457
H	2.18036	-1.41531	0.385539		H	-0.770027	0.796455	1.52996		H	2.16583	-1.3987	0.325991		H	2.43665	-1.00479	0.184895
H	1.03282	-0.686803	1.49644		C	-1.60751	-0.216868	-0.181421		H	0.974355	-0.789231	1.46325		H	1.24693	-0.701887	1.43438
C	1.54401	0.575367	-0.17643		H	-2.57163	-0.465665	0.26538		C	1.55342	0.641172	-0.038728		C	1.39634	0.841856	-0.027718
H	2.42513	1.03622	0.272927		H	-1.79667	0.006244	-1.23516		H	2.27195	1.11116	0.639294		H	2.30638	1.42647	-0.012584
H	1.76806	0.445618	-1.2399		C	-0.667921	-1.44058	-0.088366		H	2.06228	0.612534	-1.01557		C	0.102035	1.56296	-0.188677
C	0.33893	1.51111	-0.025584		H	-0.966272	-2.19791	-0.814418		C	0.328665	1.48141	-0.161191		H	0.12037	2.18084	-1.0954
H	0.442531	2.36444	-0.698695		H	-0.727489	-1.89908	0.901119		H	0.425236	2.55241	-0.275132		H	-0.054392	2.27822	0.633694
H	0.302281	1.91698	0.988728		O	1.49863	-0.489024	0.708941		O	-1.4429	0.023795	0.860618		O	-1.35931	-0.180328	0.875545
O	-1.52284	0.033997	0.775131
					~ H1-A TS					~ H2-A TS					~ H3-B1 TS
					ε0	-309.305	ε0 + G_corr	-309.2		ε0	-309.334	ε0 + G_corr	-309.228		ε0	-309.278	ε0 + G_corr	-309.175
					Atom	X	Y	Z		Atom	X	Y	Z		Atom	X	Y	Z
					C	1.0308	-0.538354	-0.329433		C	-0.842656	1.01206	-0.342393		C	1.00545	-1.01304	-0.368269
					C	0.860492	0.842378	-0.537097		H	-1.63057	1.71086	-0.573648		H	1.52558	-1.8105	-0.89127
					H	1.66366	1.4199	-0.973014		C	-1.16281	-0.433222	-0.367791		C	1.24046	0.416577	-0.416118
					C	-0.406429	1.51857	-0.137916		H	-2.01801	-0.716195	-0.986905		H	2.13255	0.77326	-0.926576
					H	-0.194292	2.39691	0.476917		C	0.008807	-1.39258	-0.46999		C	0.174259	1.47232	-0.242586
					H	-0.854609	1.90717	-1.06292		H	-0.312943	-2.38574	-0.149702		H	0.608257	2.3167	0.299696
					C	-1.37366	0.546026	0.551492		H	0.298645	-1.47385	-1.52264		H	-0.072773	1.84244	-1.24259
					H	-2.36399	0.997833	0.614068		C	1.18401	-0.91399	0.383195		C	-1.11266	1.00414	0.466223
					H	-1.0364	0.37403	1.57635		H	2.03221	-1.59005	0.270118		H	-1.81751	1.83715	0.490741
					C	-1.43094	-0.79017	-0.193793		H	0.882433	-0.941942	1.4299		H	-0.87434	0.744704	1.49868
					H	-2.21348	-1.42861	0.218083		C	1.60816	0.513926	0.025249		C	-1.66949	-0.185454	-0.246573
					H	-1.69656	-0.606057	-1.23901		H	2.30286	0.902273	0.774927		H	-2.19025	-0.012382	-1.18235
					C	-0.074567	-1.52623	-0.126059		H	2.17957	0.505546	-0.914786		C	-1.23571	-1.42873	0.05969
					H	-0.049312	-2.33043	-0.865078		C	0.460114	1.45365	-0.140654		H	-1.51005	-2.28431	-0.543402
					H	0.059306	-1.98595	0.855402		H	0.658367	2.51794	-0.146883		H	-0.829725	-1.64677	1.03803
					O	1.88144	-0.13226	0.629505		O	-1.49079	0.004013	0.911741		O	1.5768	-0.419393	0.743104
					~ H1-A					~ H2-A					~ H3-B1
					ε0	-309.389	ε0 + G_corr	-309.283		ε0	-309.344	ε0 + G_corr	-309.237		ε0	-309.289	ε0 + G_corr	-309.188
					Atom	X	Y	Z		Atom	X	Y	Z		Atom	X	Y	Z
					C	-1.15589	-0.05414	0.022027		C	0.399905	1.30454	0.259759		C	1.15298	-1.19502	-0.252059
					C	-0.379637	-1.25306	-0.061056		H	0.968879	2.21976	0.338		H	1.45528	-2.11664	-0.737321
					H	-0.939167	-2.17657	-0.146861		C	1.19188	0.005492	0.380402		C	1.41085	0.200176	-0.521918
					C	1.10545	-1.28866	-0.087197		H	1.91581	0.124237	1.20058		H	2.20237	0.462547	-1.21967
					H	1.46854	-2.11201	0.536025		C	0.281698	-1.20048	0.620655		C	0.443069	1.31473	-0.223812
					H	1.42141	-1.5529	-1.10788		H	0.869155	-2.11157	0.499094		H	0.99209	2.09811	0.305523
					C	1.75156	0.039165	0.317853		H	-0.066937	-1.17284	1.65778		H	0.139778	1.75094	-1.18063
					H	2.80831	0.031674	0.048351		C	-0.901063	-1.18113	-0.342991		C	-0.799658	0.912122	0.580606
					H	1.70346	0.149786	1.40475		H	-1.51826	-2.07148	-0.218365		H	-1.24916	1.82676	0.978596
					C	1.02923	1.21405	-0.337593		H	-0.512208	-1.19841	-1.36284		H	-0.503836	0.306907	1.43819
					H	1.53485	2.15268	-0.106639		C	-1.74444	0.077332	-0.144553		C	-1.82501	0.188604	-0.238134
					H	1.06514	1.09938	-1.4253		H	-2.42973	0.21803	-0.984504		H	-2.20061	0.729327	-1.10363
					C	-0.427114	1.27648	0.125546		H	-2.38685	-0.027983	0.738772		C	-2.29436	-1.0261	0.012598
					H	-1.0046	2.0137	-0.431975		C	-0.911268	1.3098	0.026615		H	-3.04412	-1.48569	-0.617409
					H	-0.469513	1.5822	1.176		H	-1.42816	2.26337	-0.005825		H	-1.93913	-1.60457	0.856287
					O	-2.39125	-0.098871	0.022006		O	1.83601	-0.017057	-0.832751		O	1.95251	-0.541849	0.642046
										~ H2-B1 TS					~ H3-B2 TS
										ε0	-309.282	ε0 + G_corr	-309.18		ε0	-309.283	ε0 + G_corr	-309.181
										Atom	X	Y	Z		Atom	X	Y	Z
										C	0.841632	-0.980364	-0.283865		C	0.761476	-1.00076	-0.233269
										H	1.51749	-1.66886	-0.785265		H	1.39989	-1.79686	-0.610726
										C	1.0808	0.461039	-0.451036		C	1.28497	0.375092	-0.367231
										H	1.90118	0.752914	-1.10357		H	2.26688	0.445233	-0.843038
										C	0.016249	1.53469	-0.317159		C	0.480356	1.60941	-0.425553
										H	0.52606	2.43622	0.053072		H	0.723509	2.38853	0.286032
										H	-0.323578	1.78859	-1.32623		H	0.143953	1.94375	-1.3979
										C	-1.15136	1.2126	0.558962		C	-1.51041	0.856737	0.553573
										H	-2.07291	1.75484	0.393124		H	-2.14819	1.72058	0.426153
										H	-0.953109	0.915078	1.57801		H	-0.924454	0.81673	1.46041
										C	-1.61983	-0.868317	-0.337756		C	-1.65434	-0.232426	-0.229872
										H	-2.59126	-1.16394	0.035403		H	-2.34122	-0.199111	-1.06685
										H	-1.62405	-0.291207	-1.25107		C	-0.706003	-1.39049	-0.157317
										C	-0.494239	-1.48169	0.096447		H	-0.905931	-2.09034	-0.970146
										H	-0.534957	-2.2035	0.903827		H	-0.83817	-1.95725	0.771722
										O	1.51445	-0.198484	0.738642		O	1.33593	-0.322076	0.887795
										~ H2-B1					~ H3-B2
										ε0	-309.297	ε0 + G_corr	-309.198		ε0	-309.298	ε0 + G_corr	-309.199
										Atom	X	Y	Z		Symbol	X	Y	Z
										C	-0.660561	-0.791654	-0.090356		C	0.718435	-1.00353	-0.216703
										H	-1.29203	-1.6136	-0.418904		H	1.21546	-1.92803	-0.512145
										C	0.772445	-0.89527	-0.420733		C	1.63383	0.172788	-0.091535
										H	1.05638	-1.78273	-0.982925		H	2.6757	-0.059814	-0.300642
										C	1.71699	0.273252	-0.6319		C	1.28005	1.56464	-0.233219
										H	2.73131	-0.151789	-0.707322		H	0.397503	1.96062	0.239573
										H	1.51954	0.698638	-1.62154		H	1.93727	2.2285	-0.77376
										C	1.70836	1.3286	0.409416		C	-2.39652	0.519304	0.518786
										H	2.0736	2.31833	0.179801		H	-2.93308	1.4574	0.56572
										H	1.50575	1.07398	1.43809		H	-2.60444	-0.204051	1.29779
										C	-2.65478	0.642051	-0.198042		C	-1.51922	0.267071	-0.442755
										H	-3.1541	1.59113	-0.062199		H	-1.33366	1.01701	-1.20364
										H	-3.24798	-0.170751	-0.599919		C	-0.753448	-1.01317	-0.575175
										C	-1.37276	0.47976	0.110705		H	-0.820461	-1.37168	-1.60741
										H	-0.795814	1.30029	0.518368		H	-1.22024	-1.78119	0.048903
										O	0.318149	-1.18549	0.897751		O	1.11339	-0.545169	1.06115
										~ H2-B2 TS					~ H3-B1A TS
										ε0	-309.311	ε0 + G_corr	-309.207		ε0	-309.265	ε0 + G_corr	-309.168
										Atom	X	Y	Z		Atom	X	Y	Z
										C	-1.01149	1.05462	-0.085821		C	1.28913	-1.06728	-0.441729
										H	-1.87056	1.59655	-0.461105		H	1.55267	-1.93703	-1.02881
										C	-1.1456	-0.808216	-0.321241		C	1.43603	0.320144	-0.597306
										H	-2.03846	-1.17818	-0.809812		H	2.31125	0.722592	-1.11578
										C	0.194926	-1.45845	-0.453391		C	0.489754	1.36532	-0.106837
										H	0.129727	-2.5143	-0.160209		H	1.04261	2.0658	0.526277
										H	0.498036	-1.45904	-1.50637		H	0.217802	1.9482	-0.998898
										C	1.25003	-0.762565	0.415846		C	-0.776724	0.889273	0.607251
										H	2.19102	-1.30975	0.342967		H	-1.26208	1.77745	1.02408
										H	0.931403	-0.817627	1.45569		H	-0.502095	0.250064	1.44478
										C	1.49814	0.705148	0.02797		C	-1.75107	0.186601	-0.288875
										H	2.07707	1.19353	0.820259		H	-2.03879	0.724654	-1.18921
										H	2.14435	0.735396	-0.856412		C	-2.28738	-1.00285	-0.052956
										C	0.26134	1.48961	-0.293647		H	-3.00375	-1.44663	-0.731054
										H	0.370555	2.37841	-0.901731		H	-2.01874	-1.57778	0.824707
										O	-1.33965	0.006768	0.792303		O	1.66284	-0.834321	0.815826
										~ H2-B2					~ H3-B1A
										ε0	-309.337	ε0 + G_corr	-309.232		ε0	-309.349	ε0 + G_corr	-309.249
										Atom	X	Y	Z		Atom	X	Y	Z
										C	1.60115	-0.198302	-0.176819		C	1.52008	-0.496262	0.20744
										H	2.62411	-0.434082	-0.433477		H	0.760589	-1.00423	0.819423
										C	-0.383742	-1.43517	0.394092		C	1.20433	0.790686	-0.30405
										H	-0.570943	-2.4491	0.72268		H	1.98673	1.259	-0.891475
										C	-1.54279	-0.583374	0.004227		C	-0.040837	1.56671	-0.066817
										H	-2.13316	-1.09196	-0.77406		H	0.210434	2.42051	0.577926
										H	-2.20434	-0.534105	0.875859		H	-0.345452	2.02707	-1.01423
										C	-1.22454	0.834482	-0.474554		C	-1.23602	0.814912	0.535789
										H	-2.15164	1.41111	-0.478451		H	-2.01223	1.5563	0.747993
										H	-0.871488	0.804341	-1.5071		H	-0.969445	0.367161	1.49463
										C	-0.168949	1.54382	0.375994		C	-1.79924	-0.227164	-0.383065
										H	-0.196049	2.61428	0.164949		H	-2.04414	0.114602	-1.38538
										H	-0.419613	1.44178	1.43794		C	-2.01635	-1.49583	-0.064792
										C	1.22255	1.04613	0.100298		H	-2.4349	-2.19547	-0.775066
										H	2.01886	1.7788	0.074089		H	-1.78163	-1.88178	0.920148
										O	0.860273	-1.34832	-0.177731		O	2.60478	-1.04769	-0.005125
										~ H2-AB1 TS					~ H3-B2A TS
										ε0	-309.321	ε0 + G_corr	-309.219		ε0	-309.292	ε0 + G_corr	-309.193
										Atom	X	Y	Z		Atom	X	Y	Z
										C	0.45983	1.3572	0.237102		C	0.701103	-0.956135	-0.196801
										H	0.966007	2.3016	0.420476		H	1.17067	-1.88217	-0.549209
										C	1.39643	0.181686	0.260303		C	1.67414	0.172699	-0.183488
										H	1.89898	0.026994	1.23392		H	2.70995	-0.134	-0.219492
										C	0.011762	-1.36459	0.723601		C	1.38832	1.5254	-0.169265
										H	0.690462	-2.20091	0.630953		H	0.381163	1.89196	-0.068971
										H	-0.240366	-1.07678	1.7384		H	2.19497	2.24386	-0.18484
										C	-1.00025	-1.1517	-0.345492		C	-2.35522	0.50047	0.573
										H	-1.73	-1.97209	-0.322315		H	-2.91234	1.41703	0.713445
										H	-0.506412	-1.20816	-1.31689		H	-2.48772	-0.273374	1.31893
										C	-1.73825	0.17851	-0.200615		C	-1.53918	0.333888	-0.458733
										H	-2.35393	0.355244	-1.08651		H	-1.43522	1.13487	-1.18311
										H	-2.44576	0.120162	0.635402		C	-0.735908	-0.905415	-0.714475
										C	-0.851145	1.36587	0.02401		H	-0.695639	-1.10816	-1.78841
										H	-1.35986	2.32427	0.037186		H	-1.23743	-1.76116	-0.254424
										O	1.92633	-0.25903	-0.770509		O	0.939009	-0.69429	1.13933
										~ H2-AB1 (a)					~ H3-B2A
										ε0	-309.335	ε0 + G_corr	-309.237		ε0	-309.307	ε0 + G_corr	-309.208
										Atom	X	Y	Z		Atom	X	Y	Z
										C	1.27263	1.07154	0.261646		C	0.670014	0.855248	0.213739
										H	1.69212	1.96684	0.706159		H	0.988879	1.76926	0.744935
										C	2.14299	-0.110876	0.303215		C	1.59704	-0.283367	0.556479
										H	3.1779	0.098663	0.640346		H	1.77451	-0.427572	1.61831
										C	-2.64507	0.04106	0.652366		C	2.18092	-1.07007	-0.334783
										H	-3.0611	-0.226671	1.6126		H	2.01138	-0.929027	-1.39376
										H	-3.14216	0.820088	0.089452		H	2.84193	-1.8704	-0.032327
										C	-1.56571	-0.7675	0.033482		C	-2.62997	-0.605463	-0.384787
										H	-1.99707	-1.61912	-0.515116		H	-3.08251	-1.51482	-0.755999
										H	-0.92423	-1.21017	0.797625		H	-3.18061	0.314604	-0.539148
										C	-0.685069	0.01715	-0.963492		C	-1.45377	-0.616878	0.227425
										H	0.014887	-0.677519	-1.42132		H	-0.922531	-1.55367	0.352397
										H	-1.32656	0.434456	-1.74347		C	-0.789328	0.597566	0.784444
										C	0.053412	1.13034	-0.293104		H	-0.6462	0.495817	1.86377
										H	-0.463685	2.08288	-0.239566		H	-1.38394	1.49053	0.600236
										O	1.82385	-1.24497	0.013577		O	0.5187	1.12038	-1.10419
										~ H2-AB1 (b)
										ε0	-309.336	ε0 + G_corr	-309.239
										Symbol	X	Y	Z
										C	-1.22802	0.792284	-0.000908
										H	-1.67303	1.75206	-0.235471
										C	-2.1655	-0.332374	-0.019062
										H	-1.75059	-1.33142	0.207714
										C	3.10764	0.395295	-0.243563
										H	3.71661	0.675157	-1.09011
										H	3.35807	0.818867	0.720075
										C	2.08798	-0.67752	-0.349228
										H	2.54559	-1.65177	-0.118619
										H	1.72721	-0.760876	-1.3774
										C	0.888084	-0.500372	0.605085
										H	0.282845	-1.40395	0.600205
										H	1.27725	-0.386481	1.62284
										C	0.08061	0.712679	0.271665
										H	0.653802	1.63448	0.237055
										O	-3.34532	-0.210753	-0.268778

## Sheet: ButOx_Points
chain					cis					trans
ε0	-232.534	ε0 + G_corr	-232.449		ε0	-232.541	ε0 + G_corr	-232.457		ε0	-232.543	ε0 + G_corr	-232.458
Atom	X	Y	Z		Atom	X	Y	Z		Atom	X	Y	Z
C	-1.28817	-0.525133	0.534329		C	1.59016	0.762341	-0.079974		C	-1.97123	-0.389204	-0.093883
H	-2.2711	-0.410248	0.97923		H	1.88395	1.38838	0.765095		H	-2.22041	-1.44043	0.06422
C	-0.513778	0.663869	0.173649		H	1.07536	1.38228	-0.810245		H	-2.03586	-0.17135	-1.15957
O	-1.18468	-0.106395	-0.830746		H	2.50021	0.379721	-0.544746		H	-2.71724	0.215173	0.42473
H	-0.98703	1.62647	0.354595		C	0.734168	-0.377391	0.391698		C	-0.595305	-0.091086	0.425937
C	0.9933	0.718555	0.120944		H	1.21561	-1.02298	1.1237		H	-0.440361	-0.297677	1.48297
H	1.3411	1.19953	1.0399		C	-0.734168	-0.377391	0.391698		C	0.595304	-0.091085	-0.425935
H	1.26778	1.39286	-0.695562		O	0	-1.10927	-0.601038		H	0.440358	-0.297669	-1.48297
C	1.69001	-0.624942	-0.069159		H	-1.21561	-1.02298	1.1237		C	1.97123	-0.389205	0.093881
H	1.56706	-1.26913	0.802116		C	-1.59016	0.762341	-0.079973		H	2.22041	-1.44043	-0.064219
H	1.29149	-1.14786	-0.938175		H	-1.88396	1.38837	0.765096		H	2.71724	0.21517	-0.424736
H	2.75936	-0.481413	-0.222365		H	-1.07536	1.38228	-0.810238		H	2.03586	-0.171347	1.15957
H	-0.779451	-1.45315	0.767646		H	-2.5002	0.37972	-0.544754		O	1e-06	1.144	1e-06
chain -H0a					cis -H1					trans -H1
ε0	-231.86	ε0 + G_corr	-231.789		ε0	-231.871	ε0 + G_corr	-231.801		ε0	-231.872	ε0 + G_corr	-231.801
Atom	X	Y	Z		Atom	X	Y	Z		Atom	X	Y	Z
C	1.31724	-0.472962	-0.610276		C	1.74012	0.634016	-0.038624		C	2.0086	-0.422053	-0.012412
C	0.545645	0.679435	-0.201754		H	2.06137	1.25104	0.799819		H	2.19671	-1.47942	-0.194676
O	1.28009	-0.208694	0.728977		H	1.37561	1.29549	-0.835187		H	2.24902	-0.202525	1.0365
H	1.0242	1.64941	-0.29764		H	2.60866	0.098792	-0.424054		H	2.68309	0.16168	-0.639941
C	-0.951814	0.725146	-0.044828		C	0.698125	-0.325506	0.395147		C	0.598058	-0.085555	-0.31361
H	-1.3464	1.27879	-0.902276		C	-0.747371	-0.307045	0.466631		C	-0.635902	-0.08173	0.439003
H	-1.17996	1.33337	0.835626		O	0.025214	-1.15606	-0.466515		H	-0.584496	-0.15094	1.52451
C	-1.63549	-0.633331	0.065849		H	-1.21775	-0.884823	1.25667		C	-1.96542	-0.405253	-0.17106
H	-1.51228	-1.2171	-0.846925		C	-1.61064	0.741219	-0.170834		H	-2.22819	-1.44268	0.047066
H	-1.22412	-1.21022	0.893502		H	-1.9126	1.47756	0.576983		H	-2.74906	0.233469	0.239394
H	-2.70402	-0.508975	0.239073		H	-1.08155	1.25758	-0.970062		H	-1.93197	-0.276149	-1.2513
H	1.04835	-1.44546	-1.00712		H	-2.51687	0.296726	-0.585971		O	0.041611	1.14051	-0.051635
chain -H0b					cis -H2					trans -H2
ε0	-231.86	ε0 + G_corr	-231.789		ε0	-231.873	ε0 + G_corr	-231.803		ε0	-231.874	ε0 + G_corr	-231.804
Atom	X	Y	Z		Atom	X	Y	Z		Atom	X	Y	Z
C	1.2659	-0.459072	-0.615373		C	1.57194	0.827606	-0.085229		C	-1.98516	-0.398189	-0.147813
C	0.522031	0.677521	-0.121924		H	2.51738	1.0717	0.373799		H	-2.25409	0.033417	-1.10055
O	1.2439	-0.290402	0.738462		H	1.21516	1.44046	-0.897811		H	-2.71785	-0.978258	0.391318
H	1.00365	1.65227	-0.105682		C	0.823282	-0.31889	0.366145		C	-0.671006	-0.173601	0.401399
C	-0.979261	0.711962	-0.017449		H	1.32966	-0.964006	1.07752		H	-0.497054	-0.528102	1.41252
H	-1.34029	1.31307	-0.858147		C	-0.666074	-0.39682	0.381469		C	0.541425	-0.01511	-0.44241
H	-1.24552	1.26716	0.886477		O	0.060871	-1.06881	-0.632658		H	0.392847	-0.082276	-1.5185
C	-1.65531	-0.653949	-0.015293		H	-1.08641	-1.06578	1.13148		C	1.90473	-0.408398	0.048278
H	-1.44495	-1.19833	-0.935887		C	-1.56892	0.727611	-0.032466		H	2.14065	-1.43002	-0.254582
H	-1.30162	-1.2613	0.816841		H	-1.85168	1.32465	0.836282		H	2.6644	0.252935	-0.372552
H	-2.73554	-0.543812	0.077831		H	-1.09106	1.37825	-0.761335		H	1.95799	-0.341704	1.13451
H	2.19288	-0.564634	-1.16889		H	-2.4814	0.328138	-0.47818		O	-0.053354	1.13072	0.143889
chain -H1
ε0	-231.863	ε0 + G_corr	-231.792
Atom	X	Y	Z
C	-1.42156	0.497143	-0.488146
H	-2.38194	0.288259	-0.94418
C	-0.481703	-0.578485	-0.256882
O	-1.21129	-0.142252	0.819905
C	1.0014	-0.691609	-0.250818
H	1.32575	-1.00676	-1.24412
H	1.27726	-1.49295	0.438841
C	1.71515	0.608554	0.152774
H	1.52137	1.40452	-0.566869
H	1.37645	0.944395	1.13238
H	2.79328	0.452677	0.197317
H	-1.1016	1.53426	-0.514166
chain -H2
ε0	-231.872	ε0 + G_corr	-231.803
Atom	X	Y	Z
C	1.29852	-0.432403	-0.580486
H	2.28886	-0.235549	-0.980797
C	0.484823	0.701222	-0.080965
O	1.14926	-0.24294	0.815416
H	0.965117	1.67386	-0.092881
C	-0.966069	0.710217	-0.093746
H	-1.45616	1.65988	-0.258341
C	-1.78026	-0.52577	0.027317
H	-1.2346	-1.30652	0.558068
H	-2.71199	-0.336048	0.562647
H	-2.06263	-0.928801	-0.955021
H	0.79522	-1.3029	-0.989715

## Sheet: CyOx_Scans
H1-Cl Scan				H2(a)-Cl Scan				H2(e)-Cl Scan				H3(a)-Cl Scan				H3(e)-Cl Scan
d(C,H)	d(H,Cl)	E		d(C,H)	d(H,Cl)	E		d(C,H)	d(H,Cl)	E		d(C,H)	d(H,Cl)	E		d(C,H)	d(H,Cl)	E
1.08601	4.64661	-770.166		1.09286	4.7136	-770.166		1.09146	4.34661	-770.166		1.09533	3.28445	-770.167		1.09272	3.22608	-770.167
1.086	4.54661	-770.166		1.09287	4.6136	-770.166		1.09143	4.24661	-770.166		1.09578	3.18445	-770.168		1.09273	3.12608	-770.167
1.08599	4.44661	-770.166		1.09284	4.5136	-770.166		1.0914	4.14661	-770.166		1.09633	3.08445	-770.168		1.09329	3.02608	-770.168
1.08598	4.34661	-770.166		1.09282	4.4136	-770.166		1.09136	4.0466	-770.166		1.09701	2.98445	-770.168		1.09402	2.92608	-770.168
1.08599	4.24661	-770.166		1.09279	4.3136	-770.166		1.09136	3.9466	-770.166		1.09791	2.88445	-770.169		1.09498	2.82608	-770.169
1.08601	4.14661	-770.166		1.09277	4.2136	-770.166		1.09133	3.8466	-770.167		1.09908	2.78445	-770.17		1.09623	2.72608	-770.169
1.08605	4.04661	-770.166		1.09274	4.1136	-770.167		1.09131	3.74661	-770.167		1.1006	2.68445	-770.17		1.09786	2.62608	-770.17
1.08612	3.94661	-770.167		1.09271	4.0136	-770.167		1.09131	3.6466	-770.167		1.10258	2.58445	-770.171		1.09996	2.52608	-770.17
1.08623	3.84661	-770.167		1.09269	3.9136	-770.167		1.09136	3.5466	-770.167		1.10513	2.48445	-770.172		1.10269	2.42608	-770.171
1.0864	3.74661	-770.167		1.09267	3.8136	-770.167		1.09151	3.4466	-770.167		1.10843	2.38445	-770.173		1.10623	2.32608	-770.172
1.08665	3.6466	-770.167		1.09266	3.7136	-770.167		1.09179	3.34661	-770.167		1.1127	2.28445	-770.174		1.11083	2.22608	-770.173
1.08698	3.5466	-770.167		1.09267	3.6136	-770.167		1.09217	3.24661	-770.167		1.11824	2.18445	-770.175		1.11682	2.12608	-770.174
1.0874	3.44661	-770.167		1.09271	3.5136	-770.167		1.09261	3.1466	-770.168		1.12609	2.08445	-770.177		1.12544	2.02608	-770.175
1.0874	3.3466	-770.168		1.09283	3.4136	-770.167		1.09309	3.04661	-770.168		1.13693	1.98445	-770.178		1.13769	1.92608	-770.176
1.08791	3.24661	-770.168		1.09305	3.3136	-770.167		1.09368	2.94661	-770.168		1.15153	1.88445	-770.179		1.15445	1.82608	-770.177
1.08849	3.14661	-770.168		1.09343	3.2136	-770.168		1.09445	2.84661	-770.169		1.17276	1.78445	-770.18		1.17941	1.72608	-770.177
1.08915	3.04661	-770.169		1.094	3.1136	-770.168		1.09546	2.74661	-770.169		1.2052	1.68445	-770.18		1.22941	1.65319	-770.177
1.08995	2.94661	-770.169		1.09475	3.0136	-770.168		1.09682	2.6466	-770.17		1.2552	1.61939	-770.18		1.27941	1.58923	-770.177
1.09094	2.8466	-770.17		1.09568	2.9136	-770.168		1.09862	2.54661	-770.17		1.3052	1.56326	-770.18		1.32941	1.53603	-770.176
1.09219	2.74661	-770.17		1.09681	2.8136	-770.169		1.10103	2.4466	-770.171		1.3552	1.51676	-770.179		1.37941	1.49233	-770.176
1.09377	2.64661	-770.171		1.09819	2.7136	-770.169		1.10421	2.3466	-770.172		1.4052	1.47838	-770.179		1.42941	1.45699	-770.175
1.0958	2.5466	-770.172		1.09993	2.6136	-770.17		1.10844	2.24661	-770.173		1.4552	1.447	-770.179		1.47941	1.42812	-770.176
1.09842	2.44661	-770.173		1.10215	2.5136	-770.171		1.11403	2.14661	-770.174		1.5052	1.42107	-770.18		1.52941	1.40448	-770.176
1.10181	2.3466	-770.174		1.10499	2.4136	-770.172		1.12211	2.04661	-770.175		1.5552	1.39974	-770.18		1.57941	1.38512	-770.176
1.10622	2.2466	-770.176		1.10873	2.3136	-770.173		1.13364	1.94661	-770.176		1.6052	1.38217	-770.18		1.62941	1.36913	-770.176
1.11244	2.14661	-770.177		1.11395	2.2136	-770.174		1.14942	1.8466	-770.176		1.6552	1.36749	-770.18		1.67941	1.35588	-770.176
1.12085	2.04661	-770.178		1.12071	2.1136	-770.175		1.17282	1.7466	-770.177		1.7052	1.35529	-770.181		1.72941	1.34484	-770.177
1.13132	1.94661	-770.179		1.12999	2.0136	-770.176		1.22282	1.66686	-770.176		1.7552	1.34504	-770.181		1.77941	1.33552	-770.177
1.14814	1.8466	-770.18		1.14299	1.9136	-770.177		1.27282	1.59709	-770.176		1.8052	1.33638	-770.181		1.82941	1.32762	-770.177
1.17142	1.74661	-770.18		1.16194	1.8136	-770.177		1.32282	1.53955	-770.175		1.8552	1.32896	-770.181		1.87941	1.32078	-770.177
1.22142	1.67381	-770.18		1.19089	1.7136	-770.178		1.37282	1.49269	-770.175		1.9052	1.32272	-770.181		1.92941	1.31491	-770.177
1.27142	1.61017	-770.179		1.24089	1.6373	-770.177		1.42282	1.45398	-770.175		1.9552	1.31734	-770.18		1.97941	1.30966	-770.177
1.32142	1.55595	-770.178		1.29089	1.57247	-770.177		1.47282	1.42676	-770.176		2.0052	1.31269	-770.18		2.02941	1.30529	-770.177
1.37142	1.51124	-770.178		1.34089	1.5199	-770.177		1.52282	1.40327	-770.177		2.0552	1.30868	-770.18		2.07941	1.30158	-770.177
1.42142	1.47429	-770.177		1.39089	1.47759	-770.177		1.57282	1.38394	-770.178		2.1052	1.30521	-770.18		2.12941	1.29844	-770.177
1.47142	1.44385	-770.177		1.44089	1.44399	-770.177		1.62282	1.36808	-770.179		2.1552	1.30221	-770.18		2.17941	1.29572	-770.177
1.52142	1.41871	-770.177		1.49089	1.41666	-770.178		1.67282	1.35502	-770.179		2.2052	1.29958	-770.179		2.27941	1.29149	-770.176
1.57142	1.39788	-770.177		1.54089	1.39438	-770.179		1.72282	1.34407	-770.18		2.3052	1.29512	-770.179		2.37941	1.28823	-770.176
1.62142	1.38064	-770.176		1.59089	1.37622	-770.179		1.77282	1.33492	-770.18		2.4052	1.29163	-770.178		2.47941	1.2856	-770.175
1.67142	1.36629	-770.176		1.64089	1.36134	-770.18		1.82282	1.32722	-770.181		2.5052	1.28896	-770.177		2.57941	1.28397	-770.175
1.72142	1.35429	-770.176		1.69089	1.34912	-770.18		1.87282	1.32062	-770.181		2.6052	1.28678	-770.177		2.67941	1.28293	-770.175
1.77142	1.3442	-770.176		1.74089	1.33894	-770.181		1.92282	1.31509	-770.181		2.7052	1.285	-770.176
1.82142	1.33567	-770.176		1.84089	1.32309	-770.181		1.97282	1.31034	-770.182		2.8052	1.28358	-770.176
1.87142	1.32839	-770.175		1.94089	1.31176	-770.182		2.02282	1.30627	-770.182		2.9052	1.2825	-770.175
1.92142	1.3222	-770.175		2.04089	1.30357	-770.182		2.07282	1.30277	-770.182		3.0052	1.28172	-770.175
1.97142	1.31687	-770.175		2.14089	1.29741	-770.182		2.12282	1.29976	-770.182
2.02142	1.31229	-770.175		2.24089	1.29311	-770.182		2.17282	1.29714	-770.182
2.07142	1.30834	-770.174		2.34089	1.28997	-770.182		2.27282	1.29271	-770.182
2.12142	1.30492	-770.174		2.44089	1.28783	-770.182		2.37282	1.28936	-770.181
2.17142	1.30195	-770.173						2.47282	1.28686	-770.181
2.27142	1.29714	-770.173						2.57282	1.28499	-770.18
2.37142	1.29347	-770.172						2.67282	1.28363	-770.18
2.47142	1.29066	-770.171						2.77282	1.28271	-770.18
2.57142	1.2885	-770.171						2.87282	1.2821	-770.179
2.67142	1.28683	-770.17						2.97282	1.28168	-770.179
2.77142	1.28554	-770.169
2.87142	1.28451	-770.169
2.97142	1.28373	-770.168
3.07142	1.2831	-770.168

## Sheet: ButOx_Scans
chain H0a-Cl Scan				chain H0b-Cl Scan				chain H1-Cl Scan				chain H2a-Cl Scan				chain H2b-Cl Scan				cis H1-Cl Scan				cis H2-Cl Scan				trans H1-Cl Scan				trans H2-Cl Scan
d(C,H)	d(H,Cl)	E		d(C,H)	d(H,Cl)	E		d(C,H)	d(H,Cl)	E		d(C,H)	d(H,Cl)	E		d(C,H)	d(H,Cl)	E		d(C,H)	d(H,Cl)	E		d(C,H)	d(H,Cl)	E		d(C,H)	d(H,Cl)	E		d(C,H)	d(H,Cl)	E
1.08492	3.60615	-692.702		1.08988	2.66315	-692.706		1.09085	3.43667	-692.702		1.09359	3.69934	-692.702		1.09589	2.97315	-692.703		1.08961	3.32107	-692.71		1.09177	3.33124	-692.709		1.08892	3.44087	-692.711		1.08039	3.34174	-692.709
1.08496	3.50615	-692.702		1.09194	2.56315	-692.706		1.08909	3.33667	-692.703		1.09344	3.59934	-692.702		1.0968	2.87315	-692.704		1.09498	3.22107	-692.71		1.0923	3.23123	-692.709		1.08957	3.24087	-692.712		1.09189	3.24174	-692.711
1.07619	3.40615	-692.702		1.09449	2.46315	-692.707		1.0896	3.23667	-692.703		1.09334	3.49934	-692.702		1.09786	2.77315	-692.704		1.09121	3.12107	-692.71		1.0934	3.03124	-692.71		1.09022	3.14087	-692.712		1.09237	3.14174	-692.711
1.08559	3.30615	-692.703		1.09782	2.36315	-692.708		1.08998	3.13667	-692.703		1.09373	3.39934	-692.702		1.09913	2.67315	-692.705		1.09153	3.02107	-692.711		1.09419	2.93123	-692.71		1.09096	3.04087	-692.712		1.09286	3.04174	-692.711
1.08615	3.20615	-692.703		1.10221	2.26315	-692.708		1.09092	3.03667	-692.704		1.09374	3.29934	-692.703		1.10178	2.57315	-692.705		1.09238	2.92107	-692.711		1.09466	2.83124	-692.711		1.09179	2.94087	-692.713		1.09348	2.94174	-692.711
1.08687	3.10615	-692.703		1.10801	2.16315	-692.709		1.09217	2.93667	-692.704		1.09425	3.19934	-692.703		1.10345	2.47315	-692.706		1.09345	2.82107	-692.712		1.09571	2.73123	-692.711		1.09281	2.84087	-692.714		1.09424	2.84174	-692.712
1.08756	3.00615	-692.704		1.11582	2.06315	-692.71		1.09251	2.83667	-692.705		1.09515	3.09934	-692.703		1.10631	2.37315	-692.707		1.09489	2.72107	-692.713		1.09712	2.63124	-692.711		1.09412	2.74087	-692.714		1.09506	2.74174	-692.712
1.08835	2.90615	-692.704		1.12652	1.96315	-692.71		1.09382	2.73667	-692.706		1.09257	2.99934	-692.703		1.11096	2.27315	-692.708		1.09662	2.62107	-692.714		1.09871	2.53124	-692.712		1.09579	2.64087	-692.715		1.09628	2.64174	-692.713
1.08931	2.80615	-692.705		1.1416	1.86315	-692.711		1.09536	2.63667	-692.706		1.09481	2.89934	-692.703		1.11668	2.17315	-692.709		1.09878	2.52107	-692.715		1.10119	2.43124	-692.713		1.09796	2.54087	-692.716		1.09798	2.54174	-692.713
1.09052	2.70615	-692.705		1.1916	1.76768	-692.71		1.09742	2.53667	-692.707		1.09964	2.79934	-692.704		1.12448	2.07315	-692.71		1.10173	2.42107	-692.716		1.10457	2.33124	-692.713		1.10077	2.44087	-692.717		1.10105	2.44174	-692.714
1.09209	2.60615	-692.706		1.2416	1.6807	-692.709		1.10003	2.43667	-692.708		1.09981	2.69934	-692.704		1.1353	1.97315	-692.711		1.10551	2.32107	-692.717		1.1092	2.23123	-692.714		1.10443	2.34087	-692.718		1.10319	2.34174	-692.714
1.09413	2.50615	-692.707		1.2916	1.6078	-692.708		1.1035	2.33667	-692.709		1.10149	2.59934	-692.705		1.15088	1.87315	-692.712		1.11056	2.22107	-692.718		1.11533	2.13123	-692.715		1.10926	2.24087	-692.719		1.10731	2.24174	-692.715
1.09679	2.40615	-692.707		1.3416	1.54921	-692.707		1.1081	2.23667	-692.711		1.10385	2.49934	-692.706		1.17437	1.77315	-692.712		1.11732	2.12107	-692.719		1.1236	2.03124	-692.716		1.1157	2.14087	-692.721		1.11291	2.14174	-692.716
1.10031	2.30615	-692.708		1.3916	1.50246	-692.706		1.1147	2.13667	-692.712		1.10699	2.39934	-692.707		1.21109	1.67315	-692.712		1.12655	2.02107	-692.721		1.13515	1.93124	-692.716		1.12442	2.04087	-692.722		1.12068	2.04174	-692.716
1.10512	2.20615	-692.709		1.4416	1.4648	-692.706		1.12329	2.03667	-692.713		1.11089	2.29934	-692.708		1.26109	1.60381	-692.712		1.13934	1.92107	-692.722		1.1518	1.83124	-692.716		1.13647	1.94087	-692.723		1.13155	1.94174	-692.717
1.11195	2.10615	-692.71		1.4916	1.43433	-692.706		1.13518	1.93667	-692.714		1.11617	2.19934	-692.709		1.31109	1.54679	-692.712		1.15762	1.82107	-692.723		1.2018	1.73457	-692.716		1.15353	1.84087	-692.724		1.14725	1.84174	-692.717
1.12095	2.00615	-692.711		1.5416	1.40961	-692.706		1.15207	1.83667	-692.715		1.12325	2.09934	-692.71		1.36109	1.50057	-692.712		1.18479	1.72107	-692.723		1.2518	1.64936	-692.715		1.1786	1.74087	-692.724		1.19725	1.74122	-692.716
1.13361	1.90615	-692.712		1.5916	1.38948	-692.706		1.17703	1.73667	-692.715		1.13297	1.99934	-692.711		1.41109	1.46348	-692.712		1.23479	1.65166	-692.723		1.3018	1.57889	-692.714		1.2286	1.6689	-692.724		1.24725	1.65243	-692.716
1.15179	1.80615	-692.712		1.6416	1.37294	-692.706		1.22703	1.66385	-692.715		1.14661	1.89934	-692.712		1.46109	1.43322	-692.713		1.28479	1.59144	-692.722		1.3518	1.52257	-692.714		1.2786	1.60631	-692.723		1.29725	1.57958	-692.715
1.20179	1.71826	-692.711		1.6916	1.35927	-692.706		1.27703	1.60086	-692.714		1.1666	1.79934	-692.712		1.51109	1.40867	-692.714		1.33479	1.54108	-692.721		1.4018	1.47873	-692.713		1.3286	1.55341	-692.722		1.34725	1.52285	-692.714
1.25179	1.64228	-692.711		1.7416	1.34794	-692.706		1.32703	1.54798	-692.713		1.19716	1.69934	-692.713		1.56109	1.38861	-692.714		1.38479	1.49954	-692.721		1.4518	1.44377	-692.714		1.3786	1.5098	-692.722		1.39725	1.47857	-692.714
1.30179	1.57867	-692.71		1.7916	1.33841	-692.706		1.37703	1.50454	-692.713		1.24716	1.62696	-692.712		1.61109	1.37212	-692.715		1.43479	1.46511	-692.721		1.5018	1.4162	-692.714		1.4286	1.47363	-692.721		1.44725	1.44371	-692.714
1.35179	1.52737	-692.709		1.8416	1.33044	-692.706		1.42703	1.46886	-692.713		1.29716	1.56517	-692.712		1.66109	1.35854	-692.715		1.48479	1.43669	-692.721		1.5518	1.3939	-692.714		1.4786	1.44371	-692.721		1.49725	1.41612	-692.715
1.40179	1.48586	-692.708		1.8916	1.32352	-692.706		1.47703	1.43945	-692.712		1.34716	1.51513	-692.712		1.71109	1.34723	-692.716		1.53479	1.41319	-692.721		1.6018	1.37599	-692.715		1.5286	1.41902	-692.721		1.54725	1.39395	-692.715
1.45179	1.4522	-692.708		1.9416	1.31799	-692.706		1.52703	1.41515	-692.712		1.39716	1.47443	-692.712		1.76109	1.33776	-692.716		1.58479	1.39374	-692.72		1.6518	1.36134	-692.715		1.5786	1.39861	-692.721		1.59725	1.37603	-692.716
1.50179	1.42479	-692.708		1.9916	1.31307	-692.706		1.57703	1.39517	-692.712		1.44716	1.44189	-692.712		1.81109	1.32976	-692.716		1.63479	1.37758	-692.72		1.7018	1.34936	-692.716		1.6286	1.38162	-692.721		1.64725	1.36086	-692.716
1.55179	1.40247	-692.708		2.0416	1.30883	-692.706		1.62703	1.37854	-692.712		1.49716	1.41522	-692.713		1.86109	1.32297	-692.717		1.68479	1.36404	-692.72		1.7518	1.33936	-692.716		1.6786	1.36741	-692.721		1.69725	1.34942	-692.717
1.60179	1.38414	-692.707		2.0916	1.3052	-692.706		1.67703	1.36469	-692.712		1.54716	1.39361	-692.713		1.91109	1.31718	-692.717		1.73479	1.35267	-692.72		1.8018	1.33096	-692.716		1.7286	1.35549	-692.721		1.74725	1.33946	-692.717
1.65179	1.36897	-692.707		2.1416	1.3021	-692.706		1.72703	1.35307	-692.712		1.59716	1.3749	-692.714		1.96109	1.31226	-692.717		1.78479	1.34304	-692.72		1.8518	1.32398	-692.717		1.7786	1.34476	-692.721		1.79725	1.33114	-692.717
1.70179	1.35636	-692.707		2.2416	1.29712	-692.705		1.77703	1.34327	-692.712		1.64716	1.36141	-692.714		2.01109	1.30805	-692.717		1.83479	1.33487	-692.72		1.9018	1.31806	-692.717		1.8286	1.33687	-692.721		1.84725	1.32414	-692.718
1.75179	1.34577	-692.707		2.3416	1.29328	-692.705		1.82703	1.33497	-692.712		1.69716	1.34935	-692.715		2.06109	1.30442	-692.717		1.88479	1.32788	-692.72		1.9518	1.31296	-692.717		1.8786	1.3296	-692.72		1.89725	1.31813	-692.718
1.80179	1.33689	-692.707		2.4416	1.29034	-692.704		1.87703	1.32789	-692.711		1.74716	1.33934	-692.715		2.11109	1.30128	-692.717		1.93479	1.32189	-692.719		2.0018	1.30867	-692.717		1.9286	1.32337	-692.72		1.94725	1.31316	-692.718
1.85179	1.32933	-692.707		2.5416	1.28808	-692.704		1.92703	1.32182	-692.711		1.79716	1.33091	-692.716		2.16109	1.29856	-692.717		1.98479	1.31673	-692.719		2.0518	1.30496	-692.717		1.9786	1.31799	-692.72		1.99725	1.30886	-692.718
1.90179	1.3229	-692.707		2.6416	1.28635	-692.703		1.97703	1.31661	-692.711		1.84716	1.32351	-692.716		2.21109	1.29621	-692.716		2.03479	1.31228	-692.719		2.1018	1.30177	-692.717		2.0286	1.31338	-692.72		2.04725	1.30517	-692.718
1.95179	1.31741	-692.707		2.7416	1.28501	-692.703		2.02703	1.31213	-692.711		1.89716	1.31776	-692.716		2.31109	1.29231	-692.716		2.08479	1.30842	-692.718		2.1518	1.29901	-692.717		2.0786	1.30936	-692.719		2.09725	1.30198	-692.718
2.00179	1.31268	-692.707		2.8416	1.28396	-692.702		2.07703	1.30824	-692.71		1.94716	1.31253	-692.716		2.41109	1.28936	-692.716		2.13479	1.30506	-692.718		2.2518	1.2945	-692.717		2.1286	1.30588	-692.719		2.14725	1.29926	-692.718
2.05179	1.3086	-692.706		2.9416	1.28315	-692.702		2.12703	1.30487	-692.71		1.99716	1.30823	-692.716		2.51109	1.28714	-692.715		2.18479	1.30213	-692.718		2.3518	1.29106	-692.717		2.1786	1.30285	-692.719		2.24725	1.29471	-692.718
2.10179	1.30506	-692.706		3.0416	1.28253	-692.701		2.17703	1.30194	-692.71		2.04716	1.30444	-692.716		2.61109	1.28547	-692.714		2.28479	1.29732	-692.717		2.4518	1.28842	-692.716		2.2786	1.29787	-692.718		2.34725	1.29126	-692.718
2.15179	1.302	-692.706		3.1416	1.28202	-692.701		2.27703	1.29706	-692.709		2.09716	1.30119	-692.716		2.71109	1.2842	-692.714		2.38479	1.29364	-692.716		2.5518	1.28634	-692.716		2.3786	1.29405	-692.717		2.44725	1.28862	-692.717
2.25179	1.29694	-692.705		3.2416	1.28164	-692.701		2.37703	1.29348	-692.708		2.14716	1.29834	-692.716		2.81109	1.28322	-692.713		2.48479	1.29086	-692.716		2.6518	1.28476	-692.715		2.4786	1.29109	-692.716		2.54725	1.28661	-692.717
2.35179	1.29311	-692.705						2.47703	1.29067	-692.707		2.19716	1.29588	-692.716		2.91109	1.28244	-692.713		2.58479	1.28862	-692.715		2.7518	1.28351	-692.715		2.5786	1.2888	-692.716		2.64725	1.28506	-692.717
2.45179	1.29019	-692.704						2.57703	1.2886	-692.707		2.29716	1.29171	-692.716		3.01109	1.28186	-692.712		2.68479	1.28691	-692.714		2.8518	1.28258	-692.715		2.6786	1.28701	-692.715		2.74725	1.28392	-692.716
2.55179	1.28797	-692.703						2.67703	1.2868	-692.706		2.39716	1.28833	-692.715						2.78479	1.28559	-692.713		2.9518	1.28195	-692.714		2.7786	1.28561	-692.714		2.84725	1.28304	-692.716
2.65179	1.28628	-692.703						2.77703	1.28548	-692.706		2.49716	1.28591	-692.715						2.88479	1.28455	-692.713		3.0518	1.28154	-692.714		2.8786	1.2845	-692.714		2.94725	1.28236	-692.716
2.75179	1.28498	-692.702						2.87703	1.28446	-692.705										2.98479	1.28373	-692.712		3.1518	1.28126	-692.714		2.9786	1.28362	-692.713		3.04725	1.28184	-692.715
2.85179	1.28401	-692.702						2.97703	1.28365	-692.704										3.08479	1.28308	-692.712		3.2518	1.28105	-692.713		3.0786	1.28292	-692.713		3.14725	1.28143	-692.715
2.95179	1.28327	-692.701						3.07703	1.28301	-692.704										3.18479	1.28259	-692.712		3.3518	1.28089	-692.713		3.1786	1.28237	-692.712		3.24725	1.28112	-692.715
3.05179	1.28271	-692.701						3.17703	1.28251	-692.704										3.28479	1.28215	-692.711						3.2786	1.28189	-692.712		3.34725	1.28087	-692.714
3.15179	1.28228	-692.7						3.27703	1.2821	-692.703																		3.3786	1.2814	-692.712
3.25179	1.28194	-692.7

## Sheet: HCl
Cl					HCl
ε0	-460.167	ε0 + G_corr	-460.183		ε0	-460.837	ε0 + G_corr	-460.848
Atom	X	Y	Z		Atom	X	Y	Z
Cl	0	0	0		Cl	0	0	0.071144
					H	0	0	-1.20944
