# Supplementary material for: Experimental and theoretical study of the reactivity of a series of epoxides with chlorine atoms at 298 K
Source: Royal Society of Chemistry journal article supplement (doi:10.1039/d0cp06033j), 2021-01-01
Supplement: d0cp06033j4.xlsx [file d0cp06033j4.xlsx]

## Sheet: Experimental data
kinetic data
# experiment	Epoxide	C epoxide (ppmV)	Reference	C reference (ppmV)	Reactor		(1 ppmv = 2.46 × 1013 molecule cm-3 at 298 K and 1000 Torr total air pressure)
1	Cyclohexene oxide	17.6	propylene	31.34	3m
2	Cyclohexene oxide	17.6	propylene	31.34	3m
3	Cyclohexene oxide	17.6	ethylene	20.89	3m
4	Cyclohexene oxide	17.6	ethylene	20.89	3m
5	Cyclohexene oxide	17.6	ethylene	20.89	3m
1	1,2-epoxyhexane	20.89	ethylene	20.89	3m
2	1,2-epoxyhexane	20.89	ethylene	20.89	3m
3	1,2-epoxyhexane	20.89	ethylene	20.89	3m
4	1,2-epoxyhexane	21.11	propylene	31.34	3m
5	1,2-epoxyhexane	29.6	propylene	31.34	3m
6	1,2-epoxyhexane	29.6	propylene	31.34	3m
7	1,2-epoxyhexane	0.94	methacrolein	1.1	6m
1	1,2-epoxybutane	11.7	propylene	62.68	3m
2	1,2-epoxybutane	11.7	propylene	62.68	3m
3	1,2-epoxybutane	11.1	ethylene	62.68	3m
4	1,2-epoxybutane	1.3	ethylene	2.78	6m
1	cis-2,3-epoxybutane	1.3	propylene	18.57	6m
2	cis-2,3-epoxybutane	1.3	propylene	18.57	6m
3	cis-2,3-epoxybutane	1.3	ethylene	2.78	6m
4	cis-2,3-epoxybutane	1.3	ethylene	2.78	6m
1	trans-2,3-epoxybutane	34.1	propylene	62.98	3m
2	trans-2,3-epoxybutane	28.4	propylene	62.68	3m
3	trans-2,3-epoxybutane	28.4	ethylene	62.68	3m
4	trans-2,3-epoxybutane	34.1	ethylene	83.57	3m
