# Supplementary figures and images for: Experimental and theoretical study of the reactivity of a series of epoxides with chlorine atoms at 298 K
Source: Royal Society of Chemistry journal article supplement (doi:10.1039/d0cp06033j), 2021-01-01

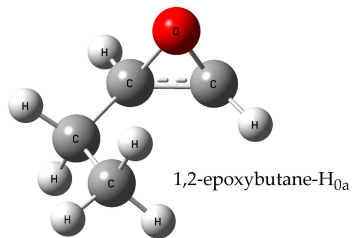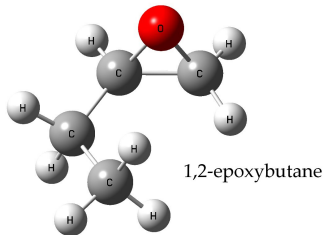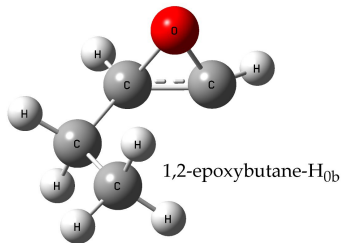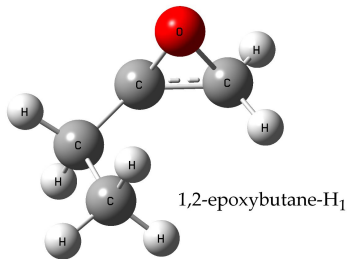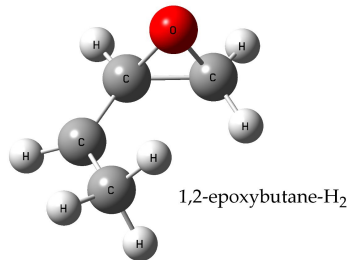

Supplement: d0cp06033j1.pdf [file d0cp06033j1.pdf]

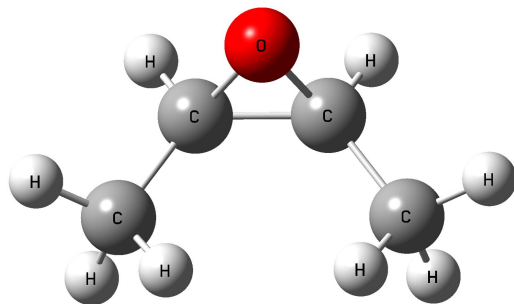

Cis-2,3-epoxybutane

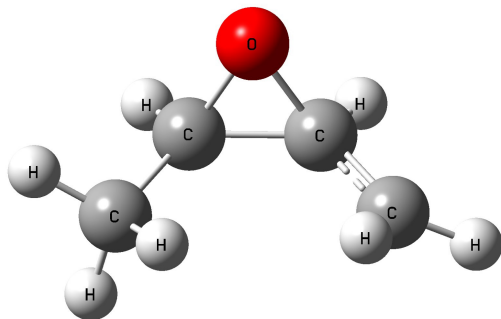

Cis-2,3-epoxybutane-H<sub>2</sub>

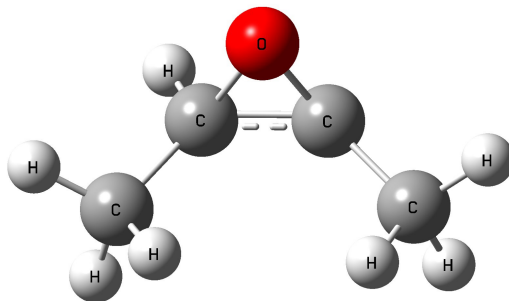

Cis-2,3-epoxybutane-H<sub>1</sub>

Supplement: d0cp06033j3.pdf [file d0cp06033j3.pdf]
